# Supplementary material
Source: PubMed Central journal article supplement (PMC6736754)
Supplement: NIHMS1035428-supplement-Appendix_Tables.pdf [file NIHMS1035428-supplement-Appendix_Tables.pdf]

## **APPENDIX TABLES**

**Appendix Table 1. Characteristics of eligible studies**

**Appendix Table 2. Baseline participant characteristics among eligible studies**

**Appendix Table 3. Quality assessment using modified QUADAS-2 tool to assess risk of bias across seven domains**

**Appendix Table 4. Multivariable model adjusted covariates in eligible studies**

**Appendix Table 5. Subgroup analyses of cardiovascular event risk in white coat hypertension and white coat effect based on study characteristics**

**Appendix Table 6. Study influence analyses of cardiovascular event risk in white coat hypertension and white coat effect**

**Appendix Table 1. Characteristics of eligible studies**

| First Author | Year | Cohort                        | Country       | Funding Source(s)*                 | Type of measurement      | Out-of-office BP threshold               | Treatment groups (treated, untreated, or combined) | Outcomes reported                                         |
|--------------|------|-------------------------------|---------------|------------------------------------|--------------------------|------------------------------------------|----------------------------------------------------|-----------------------------------------------------------|
| Verdecchia   | 1994 | PIUMA                         | Italy         | Government/Foundation              | 24-hour ABPM             | Daytime 131/86 women, 136/87 men         | Untreated                                          | CAD, stroke, TIA, CVD mortality                           |
| Kario        | 2001 | JMS-ABPM                      | Japan         | Government/Foundation              | 24-hour ABPM             | 24-hour 130/80                           | Untreated                                          | Fatal and non-fatal stroke                                |
| Bobrie       | 2004 | SHEAF                         | France        | Industry                           | Home BP                  | Daytime 135/85                           | Treated                                            | CAD, stroke, TIA, CHF, CVD mortality                      |
| Verdecchia   | 2005 | NYPEAP/PIUMA/Ohasama/JMS-ABPM | International | Industry and Government/Foundation | 24-hour ABPM             | Daytime 130/80                           | Untreated                                          | Fatal and non-fatal stroke                                |
| Ohkubo       | 2005 | Ohasama                       | Japan         | Government/Foundation              | 24-hour ABPM             | Daytime 135/85                           | Untreated, treated, combined                       | Stroke, CVD mortality                                     |
| Fagard       | 2005 | Flanders                      | Belgium       | None Reported                      | 24-hour ABPM             | Daytime 135/85                           | Untreated                                          | CAD, stroke, CVD mortality                                |
| Pierdomenico | 2005 | Chieti-Pescara                | Italy         | None Reported                      | 24-hour ABPM             | Daytime 135/85                           | Treated                                            | CAD, stroke, CHF, CVD mortality                           |
| Hansen       | 2007 | IDACO                         | International | Government/Foundation              | 24-hour ABPM             | Daytime 130/80 and Daytime 135/85        | Combined                                           | CAD, stroke, CHF, CVD mortality                           |
| Pierdomenico | 2008 | Chieti-Pescara                | Italy         | None Reported                      | 24-hour ABPM             | Daytime 135/85                           | Untreated                                          | CAD, stroke, CHF, CVD mortality                           |
| Shimada      | 2008 | J-HEALTH                      | Japan         | Industry                           | Home BP                  | Daytime 135/85                           | Treated                                            | CAD, stroke, CVD mortality                                |
| Agarwal      | 2011 | Indiana                       | USA           | Government/Foundation              | 44-hour ABPM             | Daytime 135/85                           | Combined                                           | All-cause mortality                                       |
| Hanninen     | 2012 | Finn-Home                     | Finland       | Government/Foundation              | Home BP                  | Daytime 135/85                           | Combined                                           | CAD, stroke, CHF, CVD mortality, all-cause mortality      |
| Hermida      | 2012 | MAPEC                         | Spain         | Government/Foundation              | 48-hour ABPM             | Daytime 125/80                           | Combined                                           | CAD, stroke, TIA, CHF, CVD mortality, all-cause mortality |
| Franklin     | 2012 | IDACO                         | International | Government/Foundation              | 24-hour ABPM             | Daytime 135/85                           | Untreated, treated                                 | CAD, stroke, TIA, CHF, CVD mortality                      |
| Mancia       | 2013 | PAMELA                        | Italy         | Industry and Government/Foundation | 24-hour ABPM and Home BP | 24-hour ABPM 125/79, Daytime HBPM 132/83 | Untreated, combined                                | CVD mortality, all-cause mortality                        |
| Sung         | 2013 | Taiwan-Kinmen                 | China         | Government/Foundation              | 24-hour ABPM             | Daytime 135/85                           | Untreated                                          | CVD mortality, all-cause mortality                        |
| Asayama      | 2014 | IDACO                         | International | Government/Foundation              | 24-hour ABPM             | 24-hour 130/80                           | Untreated                                          | CAD, stroke, CHF, CVD mortality, all-cause mortality      |
| Minutolo     | 2014 | Italy CKD                     | Italy         | None Reported                      | 24-hour ABPM             | Daytime 135/85, Nighttime 120/70         | Combined                                           | CAD, stroke, CHF, CVD mortality, all-cause mortality      |

|              |      |                                |               |                                    |                          |                                          |                    |                                                           |
|--------------|------|--------------------------------|---------------|------------------------------------|--------------------------|------------------------------------------|--------------------|-----------------------------------------------------------|
| Stergiou     | 2014 | IDHOCO                         | International | Government/Foundation              | Home BP                  | Daytime 135/85                           | Untreated, treated | CAD, stroke, CHF, CVD mortality                           |
| Satoh        | 2015 | Ohasama                        | Japan         | Government/Foundation              | 24-hour ABPM and Home BP | 24-hour ABPM 130/80, Daytime HBPM 135/85 | Combined           | Fatal and non-fatal stroke                                |
| Tientcheu    | 2015 | Dallas Heart Study             | USA           | Government/Foundation              | Home BP                  | Daytime 135/85                           | Combined           | CAD, stroke, TIA, CHF, CVD mortality                      |
| Wang         | 2017 | Guangdong                      | China         | Government/Foundation              | 24-hour ABPM             | 24-hour 130/80                           | Combined           | CAD, stroke, CHF, CVD mortality, all-cause mortality      |
| Pierdomenico | 2017 | Chieti-Pescara                 | Italy         | None Reported                      | 24-hour ABPM             | 24-hour 130/80                           | Treated            | CAD, stroke, CHF, CVD mortality                           |
| Banegas      | 2018 | Spanish Ambulatory BP Registry | Spain         | Industry and Government/Foundation | 24-hour ABPM             | 24-hour 130/80                           | Untreated, treated | CVD mortality, all-cause mortality                        |
| Ntineri      | 2018 | Didima                         | Greece        | Industry                           | Home BP                  | 24-hour 135/85                           | Combined           | CAD, stroke, TIA, CHF, CVD mortality, all-cause mortality |
| Fujiwara     | 2018 | J-HOP                          | Japan         | Industry and Government/Foundation | Home BP                  | Daytime 135/85                           | Combined           | CAD, stroke, CVD mortality                                |
| Spannella    | 2018 | Ancona                         | Italy         | None Reported                      | 24-hour ABPM             | 24-hour 130/80                           | Treated            | All-cause mortality                                       |

\*Funding Source(s): "Government/Foundation" signifies government, medical society, research foundation, and or intramural university grant funding; "Industry" signifies private pharmaceutical, laboratory, or device company sponsorship.

Abbreviations: ABPM = Ambulatory blood pressure monitoring; BP = blood pressure; CAD = Coronary artery disease; CHF = congestive heart failure; CKD = Chronic kidney disease; CVD = cardiovascular disease; IDACO = International Database of Ambulatory blood pressure in relation to Cardiovascular Outcomes; IDHOCO = International Database of Home blood pressure in relation to Cardiovascular Outcomes; J-HEALTH = Japan Hypertension Evaluation with Angiotensin II Antagonist Losartan Therapy; J-HOP = Japan Morning Surge-Home BP; JMS = Jichi Medical School; MAPEC = Monitorización Ambulatoria para Predicción de Eventos Cardiovasculares; NYPEAP = New York Prognostic Effects of Ambulatory blood Pressure monitoring; PAMELA = Pressioni Arteriose Monitorate E Loro Associazioni; PIUMA= Progetto Ipertensione Umbria Monitoraggio; SHEAF = Self-Measurement of Blood Pressure at Home in the Elderly: Assessment and Follow-Up; TIA = Transient ischemic attack

**Appendix Table 2. Baseline participant characteristics among eligible studies**

| First Author | Year | Number of study participants | WCH or WCE (%) | Treated for HTN (%) | Men (%) | Mean age, years | Diabetes (%) | Previous CVD (%) | CKD (%) | Current smoker (%) | Mean BMI, kg/m <sup>2</sup> | Duration of follow up, years |
|--------------|------|------------------------------|----------------|---------------------|---------|-----------------|--------------|------------------|---------|--------------------|-----------------------------|------------------------------|
| Verdecchia   | 1994 | 1,392                        | 16%            | 0%                  | 50%     | 51              | 10%          | 3%               |         | 24%                | 26.7                        | 3.2                          |
| Kario        | 2001 | 958                          | 25%            | 0%                  | 38%     | 72              | 11%          | 0%               |         | 21%                | 23.8                        | 3.5                          |
| Bobrie       | 2004 | 4,939                        | 13%            | 100%                | 49%     | 70              | 15%          | 12%              |         | 8%                 |                             | 3.0                          |
| Verdecchia   | 2005 | 5,955                        | 7%             | 0%                  | 50%     | 56              | 11%          | 0%               | 0%      | 20%                | 25.3                        | 5.4                          |
| Ohkubo       | 2005 | 1,332                        | 13%            | 30%                 | 35%     | 62              | 17%          | 5%               |         | 20%                |                             | 10.2                         |
| Fagard       | 2005 | 359                          | 24%            | 32%                 | 40%     | 70              | 8%           | 0%               |         | 18%                | 27.5                        | 10.9                         |
| Pierdomenico | 2005 | 742                          | 20%            | 100%                | 46%     | 60              | 6%           | 2%               |         | 20%                | 28.1                        | 5.0                          |
| Hansen       | 2007 | 7,030                        | 11%            | 22%                 | 55%     | 56              | 7%           | 8%               |         | 30%                | 25.5                        | 9.5                          |
| Pierdomenico | 2008 | 2,037                        | 20%            | 0%                  | 53%     | 49              | 0%           | 0%               | 0%      | 20%                | 26.4                        | 6.4                          |
| Shimada      | 2008 | 2,896                        | 13%            | 100%                | 42%     | 61              |              |                  |         |                    | 24.2                        | 3.5                          |
| Agarwal      | 2011 | 353                          | 15%            | 76%                 | 65%     | 55              | 49%          | 35%              | 100%    | 30%                | 27.7                        | 2.5                          |
| Hanninen     | 2012 | 2,046                        | 15%            | 23%                 | 46%     | 56              | 6%           | 13%              |         | 19%                | 27.4                        | 7.5                          |
| Hermida      | 2012 | 3,344                        | 28%            | 62%                 | 51%     | 53              | 20%          | 0%               | 24%     | 15%                | 29.8                        | 5.6                          |
| Franklin     | 2012 | 7,295                        | 7%             | 12%                 | 45%     | 49              | 5%           | 0%               |         | 29%                | 24.8                        | 10.6                         |
| Mancia       | 2013 | 1,589                        | 25%            | 19%                 | 48%     | 51              |              | 4%               |         | 26%                | 25.5                        | 16.0                         |
| Sung         | 2013 | 1,257                        | 12%            | 0%                  | 53%     | 53              |              |                  |         |                    | 24.8                        | 15.0                         |
| Asayama      | 2014 | 8,237                        | 11%            | 0%                  | 52%     | 51              | 6%           | 8%               |         | 30%                | 25.1                        | 11.1                         |
| Minutolo     | 2014 | 512                          | 21%            | 89%                 | 57%     | 64              | 34%          | 29%              | 100%    | 22%                | 28.9                        | 5.2                          |
| Stergiou     | 2014 | 6,458                        | 14%            | 22%                 | 43%     | 59              | 8%           | 10%              |         | 21%                | 29.3                        | 8.3                          |
| Satoh        | 2015 | 1,464                        | 9%             | 31%                 | 32%     | 61              | 14%          | 1%               |         | 15%                | 23.4                        | 17.1                         |
| Tientcheu    | 2015 | 3,027                        | 4%             | 21%                 | 45%     | 43              | 12%          | 7%               | 9%      | 28%                | 29.4                        | 9.4                          |
| Wang         | 2017 | 588                          | 10%            | 75%                 | 57%     | 43              |              |                  | 100%    | 19%                | 23.2                        | 2.9                          |
| Pierdomenico | 2017 | 1,191                        | 19%            | 100%                | 42%     | 68              | 12%          | 9%               |         | 12%                | 27.9                        | 9.1                          |
| Banegas      | 2018 | 63,910                       | 27%            | 60%                 | 58%     | 58              | 20%          | 11%              |         | 16%                | 29.3                        | 4.7                          |
| Ntineri      | 2018 | 665                          | 5%             | 15%                 | 42%     | 54              | 5%           | 9%               |         | 25%                | 27.1                        | 19.0                         |
| Fujiwara     | 2018 | 4,261                        | 14%            | 79%                 | 47%     | 65              | 24%          | 13%              |         | 12%                | 24.3                        | 3.9                          |
| Spannella    | 2018 | 120                          | 36%            | 100%                | 47%     | 71              | 9%           | 17%              |         | 36%                | 27.1                        | 10.0                         |

Abbreviations: BMI = Body mass index; CKD = Chronic kidney disease; CVD = Cardiovascular disease; HTN = Hypertension; WCE = White coat effect (i.e. elevated office blood pressure with normal out of office blood pressure, on treatment); WCH = White coat hypertension (i.e. elevated office blood pressure with normal out of office blood pressure, not on treatment)

**Appendix Table 3. Quality assessment using modified QUADAS-2 tool\* to assess risk of bias across seven domains**

| First Author          | Year | Patient Selection | Index test (quality of ABPM or HBPM assessment) | Reference standard (quality of in-office BP assessment) | Flow and timing | Statistical analyses | Handling of Confounding | Outcome assessment | Total number of domains with low risk of bias |
|-----------------------|------|-------------------|-------------------------------------------------|---------------------------------------------------------|-----------------|----------------------|-------------------------|--------------------|-----------------------------------------------|
| Verdecchia            | 1994 | High              | Low                                             | Low                                                     | Low             | Low                  | Low                     | Low                | 6                                             |
| Kario                 | 2001 | Low               | Low                                             | Low                                                     | Low             | Low                  | High                    | Low                | 6                                             |
| Bobrie <sup>†</sup>   | 2004 | Low               | Low                                             | Low                                                     | Low             | Low                  | High                    | Low                | 6                                             |
| Verdecchia            | 2005 | High              | Low                                             | Low                                                     | Low             | Low                  | Low                     | Low                | 6                                             |
| Ohkubo <sup>†</sup>   | 2005 | Low               | Low                                             | Low                                                     | Low             | Low                  | High                    | High               | 5                                             |
| Fagard                | 2005 | Low               | Low                                             | Low                                                     | Low             | Low                  | Low                     | Low                | 7                                             |
| Pierdomenico          | 2005 | High              | Low                                             | Low                                                     | Low             | Low                  | Low                     | Low                | 6                                             |
| Hansen                | 2007 | High              | High                                            | Low                                                     | Low             | Low                  | Low                     | Low                | 5                                             |
| Pierdomenico          | 2008 | High              | Low                                             | Low                                                     | Low             | Low                  | Low                     | Low                | 6                                             |
| Shimada               | 2008 | Low               | Low                                             | Low                                                     | Low             | Low                  | Low                     | Low                | 7                                             |
| Agarwal               | 2011 | Low               | Low                                             | Low                                                     | Low             | Low                  | High                    | High               | 5                                             |
| Hanninen <sup>†</sup> | 2012 | Low               | Low                                             | Low                                                     | Low             | Low                  | High                    | Low                | 6                                             |
| Hermida               | 2012 | Low               | Low                                             | Low                                                     | Low             | Low                  | High                    | Low                | 6                                             |
| Franklin              | 2012 | High              | High                                            | Low                                                     | Low             | Low                  | Low                     | Low                | 5                                             |
| Mancia <sup>†</sup>   | 2013 | Low               | Low                                             | Low                                                     | Low             | Low                  | High                    | Low                | 6                                             |
| Sung <sup>†</sup>     | 2013 | Low               | High                                            | Low                                                     | Low             | Low                  | High                    | Low                | 5                                             |
| Asayama               | 2014 | High              | High                                            | Low                                                     | Low             | Low                  | Low                     | Low                | 5                                             |
| Minutolo <sup>†</sup> | 2014 | High              | Low                                             | Low                                                     | Low             | Low                  | High                    | Low                | 5                                             |
| Stergiou <sup>†</sup> | 2014 | High              | Low                                             | Low                                                     | Low             | Low                  | High                    | Low                | 5                                             |
| Satoh                 | 2015 | Low               | Low                                             | Low                                                     | Low             | Low                  | Low                     | Low                | 7                                             |
| Tientcheu             | 2015 | Low               | High                                            | Low                                                     | Low             | Low                  | Low                     | Low                | 6                                             |
| Wang <sup>†</sup>     | 2017 | Low               | Low                                             | Low                                                     | Low             | Low                  | High                    | Low                | 6                                             |
| Pierdomenico          | 2017 | High              | Low                                             | Low                                                     | Low             | Low                  | Low                     | Low                | 6                                             |
| Banegas               | 2018 | High              | Low                                             | Low                                                     | Low             | Low                  | Low                     | High               | 5                                             |
| Ntineri <sup>†</sup>  | 2018 | Low               | Low                                             | Low                                                     | Low             | Low                  | High                    | Low                | 6                                             |
| Fujiwara              | 2018 | High              | Low                                             | Low                                                     | Low             | Low                  | Low                     | Low                | 6                                             |
| Spannella             | 2018 | High              | Low                                             | Low                                                     | Low             | Low                  | Low                     | High               | 5                                             |

\*The QUADAS-2 tool assesses if there is a low, high, or unclear risk of bias based on the first four domains (patient selection, index test, reference standard, flow and timing). The tool used for this study was modified to also incorporate quality of analyses, handling of confounding, and outcome assessment. For inclusion, studies were required to have low risk of bias across at least five out of seven domains.

<sup>†</sup>Studies were reviewed separately by outcome; the results were the same across outcomes except with regard to confounding: studies were determined to have a high risk of bias in the handling of confounding if the same covariates were used, without sufficient justification (e.g. exclusion for risk factors for non-cardiac mortality), for analyzing cardiovascular events and all-cause mortality.

Abbreviations: ABPM = Ambulatory blood pressure monitoring; BP = blood pressure; HBPM = home blood pressure monitoring; QUADAS = Quality Assessment of Diagnostic Accuracy Studies

**Appendix Table 4. Multivariable model adjusted covariates\* in eligible studies**

| Author       | Year | Age and sex | Previous CVD events | HTN medication | Smoking status | Lipids or HL | DM or glycemic control | BMI or obesity | Kidney function or CKD | LVH or BNP | Clinic BP | Alcohol use | Other                    |
|--------------|------|-------------|---------------------|----------------|----------------|--------------|------------------------|----------------|------------------------|------------|-----------|-------------|--------------------------|
| Verdecchia   | 1994 | ✓           | ✓                   | N/A            | ✓              | ✓            | ✓                      | ✓              | N/A                    | ✓          | ✓         |             | ABPM SBP and DBP         |
| Kario        | 2001 | ✓           | N/A                 | ✓              |                |              |                        | ✓              | N/A                    |            |           |             |                          |
| Bobrie       | 2004 | ✓           | ✓                   | N/A            | ✓              | ✓            | ✓                      | ✓              |                        |            |           |             | Heart rate               |
| Verdecchia   | 2005 | ✓           | N/A                 | ✓              | ✓              | ✓            |                        | ✓              | N/A                    |            |           |             |                          |
| Ohkubo       | 2005 | ✓           | ✓                   | ✓              | ✓              | ✓            | ✓                      |                |                        |            |           |             |                          |
| Fagard       | 2005 | ✓           | N/A                 | ✓              | ✓              | ✓            | ✓                      | ✓              |                        |            |           |             |                          |
| Pierdomenico | 2005 | ✓           | ✓                   | ✓              | ✓              | ✓            | ✓                      | ✓              | ✓                      | ✓          | ✓         |             | Family history of CVD    |
| Hansen       | 2007 | ✓           | ✓                   | ✓              | ✓              | ✓            | ✓                      | ✓              |                        |            |           | ✓           |                          |
| Pierdomenico | 2008 | ✓           | N/A                 | ✓              | ✓              | ✓            | N/A                    | ✓              | ✓                      | ✓          | ✓         |             | Family history CVD       |
| Shimada      | 2008 | ✓           | ✓                   | N/A            | ✓              |              | ✓                      |                | N/A                    |            |           | ✓           |                          |
| Agarwal      | 2011 | ✓           | ✓                   |                |                |              | N/A                    |                | N/A                    |            |           |             | Race, Hgb, albumin       |
| Hanninen     | 2012 | ✓           | ✓                   | ✓              | ✓              | ✓            | ✓                      | ✓              |                        |            |           | ✓           |                          |
| Hermida      | 2012 | ✓           | N/A                 | ✓              |                |              | ✓                      |                | ✓                      |            |           |             | Sleep duration           |
| Franklin     | 2012 | ✓           | N/A                 | ✓              | ✓              | ✓            | ✓                      | ✓              |                        |            |           |             |                          |
| Mancia       | 2013 | ✓           | ✓                   | ✓              | ✓              | ✓            | ✓                      | ✓              |                        |            |           |             |                          |
| Sung         | 2013 | ✓           | N/A                 | N/A            | ✓              | ✓            | ✓                      | ✓              |                        |            |           |             |                          |
| Asayama      | 2014 | ✓           | ✓                   | N/A            | ✓              | ✓            | ✓                      | ✓              |                        |            |           | ✓           |                          |
| Minutolo     | 2014 | ✓           | ✓                   | ✓              |                |              | ✓                      | ✓              | ✓                      |            |           |             | Non-dipping, Hgb         |
| Stergiou     | 2014 | ✓           | ✓                   | ✓              | ✓              | ✓            | ✓                      | ✓              |                        |            |           |             |                          |
| Satoh        | 2015 | ✓           | ✓                   | ✓              | ✓              | ✓            | ✓                      | ✓              |                        |            |           | ✓           |                          |
| Tientcheu    | 2015 | ✓           | N/A                 | ✓              | ✓              | ✓            | ✓                      | ✓              |                        |            |           |             | Race                     |
| Wang         | 2017 | ✓           | ✓                   |                | ✓              | ✓            | ✓                      | ✓              | ✓                      |            |           | ✓           | Hgb, phosphate           |
| Pierdomenico | 2017 | ✓           | ✓                   | ✓              |                |              | ✓                      |                |                        | ✓          | ✓         |             | LA enlargement, ABPM SBP |
| Banegas      | 2018 | ✓           | ✓                   | ✓              | ✓              | ✓            | ✓                      | ✓              |                        |            | ✓         |             |                          |
| Ntineri      | 2018 | ✓           | ✓                   | ✓              | ✓              |              | ✓                      | ✓              |                        |            |           |             |                          |
| Fujiwara     | 2018 | ✓           | ✓                   | ✓              | ✓              | ✓            | ✓                      | ✓              | ✓                      | ✓          |           |             |                          |
| Spannella    | 2018 | ✓           | ✓                   | ✓              |                | ✓            |                        |                | ✓                      |            |           |             |                          |

\*Confounding was considered to be adequately addressed in the QUADAS-2 assessment if there was adjustment for age, sex, previous CVD events, HTN medication, and at least two additional covariates among smoking status, lipids, DM, BMI, kidney function, LVH, clinic BP, and alcohol use.

All studies that included both cardiovascular events and all-cause mortality used the same covariates in models evaluating each outcome.

Abbreviations: ABPM = Ambulatory blood pressure; BMI = Body mass index; BNP = B-type natriuretic peptide; BP = Blood pressure; CKD = Chronic kidney disease; CVD = Cardiovascular disease; DBP = Diastolic blood pressure; DM = diabetes mellitus; Hgb = Hemoglobin; HL = hyperlipidemia; HTN = Hypertension; LA = Left atrial; LVH = Left ventricular hypertrophy; N/A = Not applicable (due to exclusion criteria or other cohort characteristic); SBP = Systolic blood pressure

**Appendix Table 5. Subgroup analyses of cardiovascular event risk in white coat hypertension and white coat effect based on study characteristics**

| Subgroup analysis                                   | White coat hypertension (untreated) |                  |                          | White coat effect (treated) |                  |                          | Combined white coat hypertension and white coat effect |                   |                          |
|-----------------------------------------------------|-------------------------------------|------------------|--------------------------|-----------------------------|------------------|--------------------------|--------------------------------------------------------|-------------------|--------------------------|
|                                                     | N                                   | HR (95% CI)      | I <sup>2</sup> (P-value) | N                           | HR (95% CI)      | I <sup>2</sup> (P-value) | N                                                      | HR (95% CI)       | I <sup>2</sup> (P-value) |
| <b>Blood pressure measurement type</b>              |                                     |                  |                          |                             |                  |                          |                                                        |                   |                          |
| ABPM                                                | 7                                   | 1.35 (1.02-2.02) | 2.9% (0.287)             | 3                           | 1.11 (0.89-1.40) | 0% (0.885)               | 6                                                      | 1.16 (0.92-1.53)  | 0% (0.406)               |
| HBPM                                                | 2                                   | 1.42 (0.88-2.31) |                          | 3                           | 1.15 (0.79-1.62) | 0% (0.887)               | 5                                                      | 1.46 (0.84-2.57)  | 57.9% (0.016)            |
| <b>Blood pressure monitor validation</b>            |                                     |                  |                          |                             |                  |                          |                                                        |                   |                          |
| Validated                                           | 7                                   | 1.51 (1.15-2.01) | 0% (0.454)               | 5                           | 1.14 (0.92-1.42) | 0% (0.977)               | 8                                                      | 1.21 (0.83-1.82)  | 49.3% (0.035)            |
| Validation undetermined                             | 1                                   | 1.20 (0.93-1.54) |                          | 1                           | 1.09 (0.79-1.52) |                          | 2                                                      | 1.28 (0.96-2.27)  |                          |
| <b>Out-of-office blood pressure threshold</b>       |                                     |                  |                          |                             |                  |                          |                                                        |                   |                          |
| Daytime <135/85                                     | 4                                   | 1.29 (1.03-1.66) | 0% (0.289)               | 4                           | 1.12 (0.89-1.42) | 0% (0.962)               | 8                                                      | 1.31 (0.97-1.80)  | 36.9% (0.073)            |
| 24-hour <130/80                                     | 3                                   | 1.36 (0.91-2.33) | 9.5% (0.199)             | 2                           | 1.13 (0.79-1.60) | 0% (0.643)               | 1                                                      | 1.96 (0.12-32.12) |                          |
| Other                                               | 1                                   | 1.45 (0.28-7.51) |                          | 0                           |                  |                          | 2                                                      | 1.01 (0.51-3.31)  |                          |
| <b>Study design regarding participant inclusion</b> |                                     |                  |                          |                             |                  |                          |                                                        |                   |                          |
| Recruited                                           | 4                                   | 1.45 (1.03-2.42) | 0% (0.318)               | 3                           | 1.15 (0.79-1.62) | 0% (0.887)               | 9                                                      | 1.28 (0.90-1.87)  | 49.6% (0.028)            |
| Referred                                            | 4                                   | 1.31 (0.92-1.98) | 0% (0.301)               | 3                           | 1.11 (0.89-1.40) | 0% (0.885)               | 1                                                      | 1.22 (0.96-1.53)  |                          |
| <b>Mean age</b>                                     |                                     |                  |                          |                             |                  |                          |                                                        |                   |                          |
| <55 years                                           | 6                                   | 1.21 (1.00-1.51) | 0% (0.520)               | 1                           | 1.09 (0.79-1.52) |                          | 5                                                      | 1.65 (0.96-3.07)  | 54.9% (0.017)            |
| ≥55 years                                           | 3                                   | 1.52 (1.09-2.12) | 0% (0.385)               | 5                           | 1.14 (0.92-1.42) | 0% (0.997)               | 6                                                      | 1.15 (0.90-1.39)  | 0% (0.519)               |
| <b>Cohort size</b>                                  |                                     |                  |                          |                             |                  |                          |                                                        |                   |                          |
| <2,000                                              | 4                                   | 1.56 (0.71-4.01) | 0% (0.317)               | 1                           | 1.20 (0.82-1.76) |                          | 5                                                      | 1.76 (1.03-2.82)  | 14.3% (0.306)            |
| ≥2,000                                              | 4                                   | 1.35 (1.09-1.77) | 0% (0.283)               | 5                           | 1.10 (0.90-1.36) | 0% (0.985)               | 5                                                      | 1.10 (0.81-1.39)  | 0% (0.151)               |
| <b>Participant risk</b>                             |                                     |                  |                          |                             |                  |                          |                                                        |                   |                          |
| Included prior CVD                                  | 5                                   | 1.36 (1.12-1.83) | 0% (0.501)               | 4                           | 1.15 (0.92-1.43) | 0% (0.972)               | 7                                                      | 1.40 (1.00-2.03)  | 47.9% (0.042)            |
| Excluded prior CVD                                  | 2                                   | 0.98 (0.44-2.20) |                          | 1                           | 1.09 (0.79-1.52) |                          | 2                                                      | 0.88 (0.56-1.37)  |                          |
| Included prior CKD or diabetes                      | 7                                   | 1.38 (1.15-1.88) | 0% (0.323)               | 6                           | 1.14 (0.93-1.41) | 0% (0.993)               | 10                                                     | 1.26 (0.95-1.73)  | 47.5% (0.045)            |
| Excluded prior CKD or diabetes                      | 1                                   | 0.97 (0.38-2.46) |                          | 0                           |                  |                          | 0                                                      |                   |                          |
| <b>Duration of follow up</b>                        |                                     |                  |                          |                             |                  |                          |                                                        |                   |                          |
| <5 years                                            | 2                                   | 1.87 (0.84-3.36) |                          | 3                           | 1.08 (0.72-1.58) | 0% (0.869)               | 2                                                      | 0.75 (0.29-3.05)  |                          |
| ≥5 years                                            | 6                                   | 1.29 (1.06-1.63) | 0% (0.429)               | 3                           | 1.14 (0.92-1.42) | 0% (0.928)               | 8                                                      | 1.32 (0.99-1.85)  | 50.7% (0.036)            |
| <b>Study year</b>                                   |                                     |                  |                          |                             |                  |                          |                                                        |                   |                          |
| On or before 2012                                   | 3                                   | 1.01 (0.53-1.97) | 0% (0.979)               | 3                           | 1.10 (0.79-1.52) | 0% (0.885)               | 4                                                      | 1.08 (0.78-1.31)  | 0% (0.429)               |
| After 2012                                          | 5                                   | 1.39 (1.15-2.13) | 0% (0.161)               | 3                           | 1.14 (0.89-1.45) | 0% (0.894)               | 6                                                      | 1.69 (1.03-2.69)  | 31.9% (0.156)            |

I<sup>2</sup> value was not reported in analyses of less than 3 studies due to insufficient statistical power to assess for heterogeneity

Abbreviations: ABPM = Ambulatory blood pressure monitoring; CI = Confidence interval; CKD = Chronic kidney disease; CVD = Cardiovascular disease; HR = Hazard ratio; N = Number of studies

**Appendix Table 6. Study influence analyses of cardiovascular event risk in white coat hypertension and white coat effect**

| White coat hypertension (untreated) |                  | White coat effect (treated) |                  | Combined white coat hypertension and white coat effect |                  |
|-------------------------------------|------------------|-----------------------------|------------------|--------------------------------------------------------|------------------|
| Study Omitted                       | HR (95% CI)      | Study Omitted               | HR (95% CI)      | Study Omitted                                          | HR (95% CI)      |
| Verdecchia 1994                     | 1.36 (1.13-1.80) | Bobrie 2004                 | 1.12 (0.88-1.41) | Fagard 2005                                            | 1.30 (0.96-1.84) |
| Fargard 2005                        | 1.37 (1.14-1.85) | Shimada 2008                | 1.13 (0.91-1.40) | Hansen 2007                                            | 1.28 (0.90-1.87) |
| Pierdomenico 2008                   | 1.38 (1.15-1.88) | Franklin 2012               | 1.14 (0.87-1.49) | Hanninen 2012                                          | 1.32 (0.96-1.88) |
| Mancia 2013                         | 1.36 (1.13-1.78) | Stergiou 2014               | 1.12 (0.85-1.45) | Mancia 2013                                            | 1.22 (0.90-1.68) |
| Sung 2013                           | 1.34 (1.10-1.68) | Pierdomenico 2017           | 1.10 (0.84-1.44) | Tientcheu 2015                                         | 1.20 (0.89-1.67) |
| Asayama 2014                        | 1.51 (1.15-2.01) | Banegas 2018                | 1.14 (0.89-1.46) | Ntineri 2018                                           | 1.14 (0.92-1.42) |
| Stergiou 2014                       | 1.35 (1.02-2.02) |                             |                  | Hermida 2012                                           | 1.35 (0.99-1.88) |
| Banegas 2018                        | 1.29 (1.06-1.61) |                             |                  | Minutolo 2014                                          | 1.24 (0.90-1.75) |
|                                     |                  |                             |                  | Wang 2017                                              | 1.26 (0.94-1.72) |
|                                     |                  |                             |                  | Fujiwara 2018                                          | 1.32 (1.00-1.85) |

Abbreviations: CI = Confidence interval; HR = Hazard ratio
