# Supplementary material
Source: PubMed Central journal article supplement (PMC6736754)
Supplement: NIHMS1035428-supplement-Protocol.pdf [file NIHMS1035428-supplement-Protocol.pdf]

## **SUPPLEMENTAL METHODS: PROTOCOL**

**1. Search Strategies**

**2. Steps for Screening Titles and Abstracts**

**3. Data Extraction Form**

**4. Modified QUADAS-2 tool for assessment of bias and overall study quality**

## Supplemental Methods: 1. Search Strategies

### PubMed Search Strategy

|   |                                                                                                                                                                                                                                                               |
|---|---------------------------------------------------------------------------------------------------------------------------------------------------------------------------------------------------------------------------------------------------------------|
| 1 | exp hypertension/ OR exp blood pressure/ OR hypertens*[ti,ab] OR blood adj pressure[ti,ab]                                                                                                                                                                    |
| 2 | blood pressure monitoring, ambulatory/ OR white coat hypertension/                                                                                                                                                                                            |
| 3 | white adj coat[tw,kw] OR office adj blood adj pressure[tw,kw] OR ambulatory adj blood adj pressure[tw,kw] OR home adj blood adj pressure[tw,kw]                                                                                                               |
| 4 | 1 or 2                                                                                                                                                                                                                                                        |
| 5 | 1 or 3                                                                                                                                                                                                                                                        |
| 6 | mortality/ OR death/ OR myocardial ischemia/ OR heart failure/ OR cardiomyopathies/ OR stroke/ OR mortality[tw] OR death[tw] OR cardiovascular[tw] OR stroke[tw] OR myocardial infarct*[tw] OR heart failure[tw] OR cardiomyopath*[tw] OR cerebrovascular[tw] |
| 7 | 4 and 6                                                                                                                                                                                                                                                       |
| 8 | 5 and 6                                                                                                                                                                                                                                                       |
| 9 | 7 or 8                                                                                                                                                                                                                                                        |

### Embase Search Strategy

|   |                                                                                                                                                                                                                                                                                                                                                                            |
|---|----------------------------------------------------------------------------------------------------------------------------------------------------------------------------------------------------------------------------------------------------------------------------------------------------------------------------------------------------------------------------|
| 1 | exp hypertension/ OR exp blood pressure/ OR elevated blood pressure/ OR hypertens*[ti,ab] OR blood adj pressure[ti,ab]                                                                                                                                                                                                                                                     |
| 2 | blood pressure measurement/ OR white coat hypertension/                                                                                                                                                                                                                                                                                                                    |
| 3 | white adj coat[tw,kw] OR office adj blood adj pressure[tw,kw] OR ambulatory adj blood adj pressure[tw,kw] OR home adj blood adj pressure[tw,kw] OR blood adj pressure adj monitoring[tw,kw]                                                                                                                                                                                |
| 4 | 1 and 2                                                                                                                                                                                                                                                                                                                                                                    |
| 5 | 1 and 3                                                                                                                                                                                                                                                                                                                                                                    |
| 6 | mortality/ OR death/ OR sudden death/ OR heart disease/ OR cardiovascular disease/ OR cerebrovascular accident/ OR heart infarction/ OR heart muscle ischemia/ OR heart failure/ or congestive heart failure/ OR cardiomyopathy/ OR mortality[tw] OR death[tw] OR cardiovascular[tw] OR stroke[tw] OR myocardial infarct*[tw] OR cardiomyopath*[tw] OR cerebrovascular[tw] |
| 7 | 4 and 6                                                                                                                                                                                                                                                                                                                                                                    |
| 8 | 5 and 6                                                                                                                                                                                                                                                                                                                                                                    |
| 9 | 7 or 8 article[it]                                                                                                                                                                                                                                                                                                                                                         |

## Supplemental Methods: 2. Steps for Screening Titles and Abstracts

1. Start with only reviewing the titles and abstracts listed in the “WCH Meta-analysis Meta-Data” Excel Document, created after identifying search results from PubMed and Embase and removing duplicates.
  - a. Determine if it is a research study
    - i. For our purposes, a research study will be defined as a clinical trial or cohort study (either prospective or retrospective) that analyzes human data
    - ii. Non-research publications include case series (i.e. descriptions of a small number of cases without comparison to a control group), review papers, meta-analyses, commentaries, or opinion pieces.
    - iii. If the study is not a research study, STOP HERE.
    - iv. If study type is not obvious by reviewing the title and abstract, proceed to the next steps. If the paper is not excluded based on the following steps, it will require full-text review
  - b. Determine if the study evaluates White Coat Hypertension or White Coat Effect
    - i. We are requiring that all studies included in the meta-analysis look at white coat hypertension
      1. There must be in-office blood pressure measurement as well as an out-of-office blood pressure measurement (either HBPM or ABPM)
      2. If the study does not assess both in-office and out-of-office blood pressure, STOP HERE.
    - ii. If evaluation of white coat hypertension or white coat effect is not obvious by reading the title and abstract, proceed to the next steps. If the paper is not excluded based on the following steps, it will require full-text review.
  - c. Determine if the study evaluates one of the primary outcomes
    - i. Mortality
    - ii. Development of cardiovascular events (e.g. fatal or non-fatal coronary artery disease, myocardial infarction, angina, stroke, transient ischemic attack, peripheral artery disease, revascularization procedure, and hospitalization for congestive heart failure)
    - iii. If the study outcomes do not include mortality or cardiovascular disease, STOP HERE
    - iv. If evaluation of cardiovascular disease or mortality is not obvious by reading the title and abstract, proceed to the next steps. If the paper is not excluded based on the following steps, it will require full-text review
  - d. Determine if the study excludes children
    - i. If the study is a pediatric study (age <18 years) or does not include separate results for adults, STOP HERE
    - ii. If age of the subjects is not obvious by reading the title and abstract, proceed to the next steps. If the paper is not excluded based on the following steps, it will require full-text review
  - e. Determine if the study duration is  $\geq 3$  years
    - i. If the study is cross-section or <3 years of follow-up, STOP HERE
    - ii. If study duration is not obvious by reading the title and abstract, proceed to the next step. If the paper is not excluded based on the following step, it will require full-text review
  - f. Determine if the reference group is normotensive or controlled hypertensive subjects
    - i. If the reference group is not normotensive or controlled hypertensive subjects or if there is no reference group, STOP HERE
    - ii. If the reference group is not obvious by reading the title and abstract, it will require full-text review
2. If the study meets the necessary criteria or if its status is unclear based on the title and abstract review, proceed to the “Data Extraction Form” for full-text review

### Supplemental Methods: 3. Data Extraction Form

#### Subject selection

|                                                      |                   |
|------------------------------------------------------|-------------------|
| Country                                              |                   |
| Recruitment method (actively recruited vs. referred) |                   |
| Setting                                              | Primary care      |
|                                                      | Outpatient clinic |
|                                                      | Community         |
|                                                      | Other             |
| Inclusion/exclusion criteria                         |                   |
| Numbers of participants screened                     |                   |
| Cohort name                                          |                   |

#### Baseline participant characteristics

|                                                                                                 |  |
|-------------------------------------------------------------------------------------------------|--|
| Total population, N                                                                             |  |
| White coat hypertension, N                                                                      |  |
| White coat effect, N                                                                            |  |
| Normotensive, N                                                                                 |  |
| Controlled hypertension, N                                                                      |  |
| Sex, n (%) male                                                                                 |  |
| Age, years (mean)                                                                               |  |
| Office systolic blood pressure, mm Hg (mean)                                                    |  |
| Office systolic blood pressure (SD)                                                             |  |
| Office diastolic blood pressure, mm Hg (mean)                                                   |  |
| Office diastolic blood pressure, mm Hg (SD)                                                     |  |
| Race, n (%) black                                                                               |  |
| On antihypertensive treatment, n (%)                                                            |  |
| History of cardiovascular disease, n (%)                                                        |  |
| Diabetes, n (%)                                                                                 |  |
| Chronic kidney disease (CKD), n (%)                                                             |  |
| Baseline creatinine or estimated glomerular filtration rate, mg/dl or ml/min/1.73m <sup>2</sup> |  |
| Body mass index, kg/m <sup>2</sup> (mean)                                                       |  |
| Current smokers, n (%)                                                                          |  |
| Other co-morbidities                                                                            |  |
| Other/notes                                                                                     |  |

#### Blood pressure measurements

| Type of measurement      | Measurement characteristics |  |
|--------------------------|-----------------------------|--|
| In-office blood pressure | Number of readings          |  |
|                          | Interval between readings   |  |
|                          | Measurement protocol        |  |
|                          | Monitor type (validated?)   |  |

|                                      |                                               |  |
|--------------------------------------|-----------------------------------------------|--|
|                                      | Credentials of individual taking measurements |  |
| Home blood pressure monitoring       | Number of readings                            |  |
|                                      | Interval between readings                     |  |
|                                      | Monitor type                                  |  |
| Ambulatory blood pressure monitoring | Number of readings                            |  |
|                                      | Interval between readings                     |  |
|                                      | Monitor type (validated?)                     |  |

**Outcomes**

| <b>Association of white coat hypertension and/or effect and fatal and/or non-fatal cardiovascular events and mortality</b> |                                                  |                                                               |                     |                     |                     |
|----------------------------------------------------------------------------------------------------------------------------|--------------------------------------------------|---------------------------------------------------------------|---------------------|---------------------|---------------------|
| <b>Reference Group<br/>(normotensive, uncontrolled hypertension)</b>                                                       | <b>Comparator group<br/>(WCH, WCE, combined)</b> | <b>Outcome (non-fatal +/- fatal CVD, all-cause mortality)</b> | <b>Hazard ratio</b> | <b>95% CI lower</b> | <b>95% CI upper</b> |
|                                                                                                                            |                                                  |                                                               |                     |                     |                     |
|                                                                                                                            |                                                  |                                                               |                     |                     |                     |
|                                                                                                                            |                                                  |                                                               |                     |                     |                     |
|                                                                                                                            |                                                  |                                                               |                     |                     |                     |
|                                                                                                                            |                                                  |                                                               |                     |                     |                     |
|                                                                                                                            |                                                  |                                                               |                     |                     |                     |
|                                                                                                                            |                                                  |                                                               |                     |                     |                     |
|                                                                                                                            |                                                  |                                                               |                     |                     |                     |
|                                                                                                                            |                                                  |                                                               |                     |                     |                     |
|                                                                                                                            |                                                  |                                                               |                     |                     |                     |
|                                                                                                                            |                                                  |                                                               |                     |                     |                     |
|                                                                                                                            |                                                  |                                                               |                     |                     |                     |
|                                                                                                                            |                                                  |                                                               |                     |                     |                     |
|                                                                                                                            |                                                  |                                                               |                     |                     |                     |
|                                                                                                                            |                                                  |                                                               |                     |                     |                     |
|                                                                                                                            |                                                  |                                                               |                     |                     |                     |

**Analysis**

|                                   |  |
|-----------------------------------|--|
| Statistical method used           |  |
| Method for confounder selection   |  |
| Covariates included in models     |  |
| Outcome variable(s)               |  |
| Source of outcome data            |  |
| Definition of outcome variable(s) |  |

#### Supplemental Methods: 4. Modified QUADAS-2 tool for assessment of bias and study quality

| Domain                  | Domain-specific question                                                                                                                                          | Addressed (yes, no, unclear) | Details |
|-------------------------|-------------------------------------------------------------------------------------------------------------------------------------------------------------------|------------------------------|---------|
| Patient selection       | Was selection of patients appropriate? (e.g. consecutive or random sample)                                                                                        |                              |         |
|                         | Were individuals selected based on recruitment (as opposed to referral)?                                                                                          |                              |         |
|                         | Was the study sample representative of the intended population?                                                                                                   |                              |         |
| Index test              | Was there a clear description of the methods of ABPM or HBPM application and ascertainment?                                                                       |                              |         |
|                         | Was the threshold for elevated ABPM or HBPM readings pre-specified and adequately justified?                                                                      |                              |         |
|                         | Was a validated blood pressure monitor used?                                                                                                                      |                              |         |
| Reference standard      | Was there as clear description of the method of in-office blood pressure measurement?                                                                             |                              |         |
|                         | Was the method of in-office blood pressure measurement sufficiently rigorous?                                                                                     |                              |         |
|                         | Was the threshold for elevated in-office readings pre-specified and adequately justified?                                                                         |                              |         |
| Flow and timing         | Was the duration of measurement clearly specified?                                                                                                                |                              |         |
|                         | Was the duration of measurement adequate?                                                                                                                         |                              |         |
|                         | Was a sufficient number of readings performed?                                                                                                                    |                              |         |
| Statistical analyses    | Were the statistical analyses clearly described?                                                                                                                  |                              |         |
|                         | Was an appropriate time-to-event analysis performed for longitudinal outcomes?                                                                                    |                              |         |
| Handling of confounding | Were all potential confounders identified?                                                                                                                        |                              |         |
|                         | Was the method of identifying confounders in the models described and appropriate?                                                                                |                              |         |
|                         | Were confounding factors adequately adjusted for in the analysis (at minimum age, sex, previous CVD, HTN medication, and at least two additional confounders)?    |                              |         |
| Outcome assessment      | Were the outcome definitions clearly described?                                                                                                                   |                              |         |
|                         | Were the outcomes selected justified by the authors and supported by the study question?                                                                          |                              |         |
|                         | Were the outcomes validly determined? (e.g. if administrative datasets were used to identify the outcomes, were they validated or was previous validation cited?) |                              |         |

## **APPENDIX TABLES**

**Appendix Table 1. Characteristics of eligible studies**

**Appendix Table 2. Baseline participant characteristics among eligible studies**

**Appendix Table 3. Quality assessment using modified QUADAS-2 tool to assess risk of bias across seven domains**

**Appendix Table 4. Multivariable model adjusted covariates in eligible studies**

**Appendix Table 5. Subgroup analyses of cardiovascular event risk in white coat hypertension and white coat effect based on study characteristics**

**Appendix Table 6. Study influence analyses of cardiovascular event risk in white coat hypertension and white coat effect**

**Appendix Table 1. Characteristics of eligible studies**

| First Author | Year | Cohort                        | Country       | Funding Source(s)*                 | Type of measurement      | Out-of-office BP threshold               | Treatment groups (treated, untreated, or combined) | Outcomes reported                                         |
|--------------|------|-------------------------------|---------------|------------------------------------|--------------------------|------------------------------------------|----------------------------------------------------|-----------------------------------------------------------|
| Verdecchia   | 1994 | PIUMA                         | Italy         | Government/Foundation              | 24-hour ABPM             | Daytime 131/86 women, 136/87 men         | Untreated                                          | CAD, stroke, TIA, CVD mortality                           |
| Kario        | 2001 | JMS-ABPM                      | Japan         | Government/Foundation              | 24-hour ABPM             | 24-hour 130/80                           | Untreated                                          | Fatal and non-fatal stroke                                |
| Bobrie       | 2004 | SHEAF                         | France        | Industry                           | Home BP                  | Daytime 135/85                           | Treated                                            | CAD, stroke, TIA, CHF, CVD mortality                      |
| Verdecchia   | 2005 | NYPEAP/PIUMA/Ohasama/JMS-ABPM | International | Industry and Government/Foundation | 24-hour ABPM             | Daytime 130/80                           | Untreated                                          | Fatal and non-fatal stroke                                |
| Ohkubo       | 2005 | Ohasama                       | Japan         | Government/Foundation              | 24-hour ABPM             | Daytime 135/85                           | Untreated, treated, combined                       | Stroke, CVD mortality                                     |
| Fagard       | 2005 | Flanders                      | Belgium       | None Reported                      | 24-hour ABPM             | Daytime 135/85                           | Untreated                                          | CAD, stroke, CVD mortality                                |
| Pierdomenico | 2005 | Chieti-Pescara                | Italy         | None Reported                      | 24-hour ABPM             | Daytime 135/85                           | Treated                                            | CAD, stroke, CHF, CVD mortality                           |
| Hansen       | 2007 | IDACO                         | International | Government/Foundation              | 24-hour ABPM             | Daytime 130/80 and Daytime 135/85        | Combined                                           | CAD, stroke, CHF, CVD mortality                           |
| Pierdomenico | 2008 | Chieti-Pescara                | Italy         | None Reported                      | 24-hour ABPM             | Daytime 135/85                           | Untreated                                          | CAD, stroke, CHF, CVD mortality                           |
| Shimada      | 2008 | J-HEALTH                      | Japan         | Industry                           | Home BP                  | Daytime 135/85                           | Treated                                            | CAD, stroke, CVD mortality                                |
| Agarwal      | 2011 | Indiana                       | USA           | Government/Foundation              | 44-hour ABPM             | Daytime 135/85                           | Combined                                           | All-cause mortality                                       |
| Hanninen     | 2012 | Finn-Home                     | Finland       | Government/Foundation              | Home BP                  | Daytime 135/85                           | Combined                                           | CAD, stroke, CHF, CVD mortality, all-cause mortality      |
| Hermida      | 2012 | MAPEC                         | Spain         | Government/Foundation              | 48-hour ABPM             | Daytime 125/80                           | Combined                                           | CAD, stroke, TIA, CHF, CVD mortality, all-cause mortality |
| Franklin     | 2012 | IDACO                         | International | Government/Foundation              | 24-hour ABPM             | Daytime 135/85                           | Untreated, treated                                 | CAD, stroke, TIA, CHF, CVD mortality                      |
| Mancia       | 2013 | PAMELA                        | Italy         | Industry and Government/Foundation | 24-hour ABPM and Home BP | 24-hour ABPM 125/79, Daytime HBPM 132/83 | Untreated, combined                                | CVD mortality, all-cause mortality                        |
| Sung         | 2013 | Taiwan-Kinmen                 | China         | Government/Foundation              | 24-hour ABPM             | Daytime 135/85                           | Untreated                                          | CVD mortality, all-cause mortality                        |
| Asayama      | 2014 | IDACO                         | International | Government/Foundation              | 24-hour ABPM             | 24-hour 130/80                           | Untreated                                          | CAD, stroke, CHF, CVD mortality                           |
| Minutolo     | 2014 | Italy CKD                     | Italy         | None Reported                      | 24-hour ABPM             | Daytime 135/85, Nighttime 120/70         | Combined                                           | CAD, stroke, CHF, CVD mortality, all-cause mortality      |



|              |      |                                |               |                                    |                          |                                          |                    |                                                           |
|--------------|------|--------------------------------|---------------|------------------------------------|--------------------------|------------------------------------------|--------------------|-----------------------------------------------------------|
| Stergiou     | 2014 | IDHOCO                         | International | Government/Foundation              | Home BP                  | Daytime 135/85                           | Untreated, treated | CAD, stroke, CHF, CVD mortality                           |
| Satoh        | 2015 | Ohasama                        | Japan         | Government/Foundation              | 24-hour ABPM and Home BP | 24-hour ABPM 130/80, Daytime HBPM 135/85 | Combined           | Fatal and non-fatal stroke                                |
| Tientcheu    | 2015 | Dallas Heart Study             | USA           | Government/Foundation              | Home BP                  | Daytime 135/85                           | Combined           | CAD, stroke, TIA, CHF, CVD mortality                      |
| Wang         | 2017 | Guangdong                      | China         | Government/Foundation              | 24-hour ABPM             | 24-hour 130/80                           | Combined           | CAD, stroke, CHF, CVD mortality, all-cause mortality      |
| Pierdomenico | 2017 | Chieti-Pescara                 | Italy         | None Reported                      | 24-hour ABPM             | 24-hour 130/80                           | Treated            | CAD, stroke, CHF, CVD mortality                           |
| Banegas      | 2018 | Spanish Ambulatory BP Registry | Spain         | Industry and Government/Foundation | 24-hour ABPM             | 24-hour 130/80                           | Untreated, treated | CVD mortality, all-cause mortality                        |
| Ntineri      | 2018 | Didima                         | Greece        | Industry                           | Home BP                  | 24-hour 135/85                           | Combined           | CAD, stroke, TIA, CHF, CVD mortality, all-cause mortality |
| Fujiwara     | 2018 | J-HOP                          | Japan         | Industry and Government/Foundation | Home BP                  | Daytime 135/85                           | Combined           | CAD, stroke, CVD mortality                                |
| Spannella    | 2018 | Ancona                         | Italy         | None Reported                      | 24-hour ABPM             | 24-hour 130/80                           | Treated            | All-cause mortality                                       |

\*Funding Source(s): "Government/Foundation" signifies government, medical society, research foundation, and or intramural university grant funding; "Industry" signifies private pharmaceutical, laboratory, or device company sponsorship.

Abbreviations: ABPM = Ambulatory blood pressure monitoring; BP = blood pressure; CAD = Coronary artery disease; CHF = congestive heart failure; CKD = Chronic kidney disease; CVD = cardiovascular disease; IDACO = International Database of Ambulatory blood pressure in relation to Cardiovascular Outcomes; IDHOCO = International Database of Home blood pressure in relation to Cardiovascular Outcomes; J-HEALTH = Japan Hypertension Evaluation with Angiotensin II Antagonist Losartan Therapy; J-HOP = Japan Morning Surge-Home BP; JMS = Jichi Medical School; MAPEC = Monitorización Ambulatoria para Predicción de Eventos Cardiovasculares; NYPEAP = New York Prognostic Effects of Ambulatory blood Pressure monitoring; PAMELA = Pressioni Arteriose Monitorate E Loro Associazioni; PIUMA= Progetto Ipertensione Umbria Monitoraggio; SHEAF = Self-Measurement of Blood Pressure at Home in the Elderly: Assessment and Follow-Up; TIA = Transient ischemic attack

**Appendix Table 2. Baseline participant characteristics among eligible studies**

| First Author | Year | Number of study participants | WCH or WCE (%) | Treated for HTN (%) | Men (%) | Mean age, years | Diabetes (%) | Previous CVD (%) | CKD (%) | Current smoker (%) | Mean BMI, kg/m <sup>2</sup> | Duration of follow up, years |
|--------------|------|------------------------------|----------------|---------------------|---------|-----------------|--------------|------------------|---------|--------------------|-----------------------------|------------------------------|
| Verdecchia   | 1994 | 1,392                        | 16%            | 0%                  | 50%     | 51              | 10%          | 3%               |         | 24%                | 26.7                        | 3.2                          |
| Kario        | 2001 | 958                          | 25%            | 0%                  | 38%     | 72              | 11%          | 0%               |         | 21%                | 23.8                        | 3.5                          |
| Bobrie       | 2004 | 4,939                        | 13%            | 100%                | 49%     | 70              | 15%          | 12%              |         | 8%                 |                             | 3.0                          |
| Verdecchia   | 2005 | 5,955                        | 7%             | 0%                  | 50%     | 56              | 11%          | 0%               | 0%      | 20%                | 25.3                        | 5.4                          |
| Ohkubo       | 2005 | 1,332                        | 13%            | 30%                 | 35%     | 62              | 17%          | 5%               |         | 20%                |                             | 10.2                         |
| Fagard       | 2005 | 359                          | 24%            | 32%                 | 40%     | 70              | 8%           | 0%               |         | 18%                | 27.5                        | 10.9                         |
| Pierdomenico | 2005 | 742                          | 20%            | 100%                | 46%     | 60              | 6%           | 2%               |         | 20%                | 28.1                        | 5.0                          |
| Hansen       | 2007 | 7,030                        | 11%            | 22%                 | 55%     | 56              | 7%           | 8%               |         | 30%                | 25.5                        | 9.5                          |
| Pierdomenico | 2008 | 2,037                        | 20%            | 0%                  | 53%     | 49              | 0%           | 0%               | 0%      | 20%                | 26.4                        | 6.4                          |
| Shimada      | 2008 | 2,896                        | 13%            | 100%                | 42%     | 61              |              |                  |         |                    | 24.2                        | 3.5                          |
| Agarwal      | 2011 | 353                          | 15%            | 76%                 | 65%     | 55              | 49%          | 35%              | 100%    | 30%                | 27.7                        | 2.5                          |
| Hanninen     | 2012 | 2,046                        | 15%            | 23%                 | 46%     | 56              | 6%           | 13%              |         | 19%                | 27.4                        | 7.5                          |
| Hermida      | 2012 | 3,344                        | 28%            | 62%                 | 51%     | 53              | 20%          | 0%               | 24%     | 15%                | 29.8                        | 5.6                          |
| Franklin     | 2012 | 7,295                        | 7%             | 12%                 | 45%     | 49              | 5%           | 0%               |         | 29%                | 24.8                        | 10.6                         |
| Mancia       | 2013 | 1,589                        | 25%            | 19%                 | 48%     | 51              |              | 4%               |         | 26%                | 25.5                        | 16.0                         |
| Sung         | 2013 | 1,257                        | 12%            | 0%                  | 53%     | 53              |              |                  |         |                    | 24.8                        | 15.0                         |
| Asayama      | 2014 | 8,237                        | 11%            | 0%                  | 52%     | 51              | 6%           | 8%               |         | 30%                | 25.1                        | 11.1                         |
| Minutolo     | 2014 | 512                          | 21%            | 89%                 | 57%     | 64              | 34%          | 29%              | 100%    | 22%                | 28.9                        | 5.2                          |
| Stergiou     | 2014 | 6,458                        | 14%            | 22%                 | 43%     | 59              | 8%           | 10%              |         | 21%                | 29.3                        | 8.3                          |
| Satoh        | 2015 | 1,464                        | 9%             | 31%                 | 32%     | 61              | 14%          | 1%               |         | 15%                | 23.4                        | 17.1                         |
| Tientcheu    | 2015 | 3,027                        | 4%             | 21%                 | 45%     | 43              | 12%          | 7%               | 9%      | 28%                | 29.4                        | 9.4                          |
| Wang         | 2017 | 588                          | 10%            | 75%                 | 57%     | 43              |              |                  | 100%    | 19%                | 23.2                        | 2.9                          |
| Pierdomenico | 2017 | 1,191                        | 19%            | 100%                | 42%     | 68              | 12%          | 9%               |         | 12%                | 27.9                        | 9.1                          |
| Banegas      | 2018 | 63,910                       | 27%            | 60%                 | 58%     | 58              | 20%          | 11%              |         | 16%                | 29.3                        | 4.7                          |
| Ntineri      | 2018 | 665                          | 5%             | 15%                 | 42%     | 54              | 5%           | 9%               |         | 25%                | 27.1                        | 19.0                         |
| Fujiwara     | 2018 | 4,261                        | 14%            | 79%                 | 47%     | 65              | 24%          | 13%              |         | 12%                | 24.3                        | 3.9                          |
| Spannella    | 2018 | 120                          | 36%            | 100%                | 47%     | 71              | 9%           | 17%              |         | 36%                | 27.1                        | 10.0                         |

Abbreviations: BMI = Body mass index; CKD = Chronic kidney disease; CVD = Cardiovascular disease; HTN = Hypertension; WCE = White coat effect (i.e. elevated office blood pressure with normal out of office blood pressure, on treatment); WCH = White coat hypertension (i.e. elevated office blood pressure with normal out of office blood pressure, not on treatment)

**Appendix Table 3. Quality assessment using modified QUADAS-2 tool\* to assess risk of bias across seven domains**

| First Author          | Year | Patient Selection | Index test (quality of ABPM or HBPM assessment) | Reference standard (quality of in-office BP assessment) | Flow and timing | Statistical analyses | Handling of Confounding | Outcome assessment | Total number of domains with low risk of bias |
|-----------------------|------|-------------------|-------------------------------------------------|---------------------------------------------------------|-----------------|----------------------|-------------------------|--------------------|-----------------------------------------------|
| Verdecchia            | 1994 | High              | Low                                             | Low                                                     | Low             | Low                  | Low                     | Low                | 6                                             |
| Kario                 | 2001 | Low               | Low                                             | Low                                                     | Low             | Low                  | High                    | Low                | 6                                             |
| Bobrie <sup>†</sup>   | 2004 | Low               | Low                                             | Low                                                     | Low             | Low                  | High                    | Low                | 6                                             |
| Verdecchia            | 2005 | High              | Low                                             | Low                                                     | Low             | Low                  | Low                     | Low                | 6                                             |
| Ohkubo <sup>†</sup>   | 2005 | Low               | Low                                             | Low                                                     | Low             | Low                  | High                    | High               | 5                                             |
| Fagard                | 2005 | Low               | Low                                             | Low                                                     | Low             | Low                  | Low                     | Low                | 7                                             |
| Pierdomenico          | 2005 | High              | Low                                             | Low                                                     | Low             | Low                  | Low                     | Low                | 6                                             |
| Hansen                | 2007 | High              | High                                            | Low                                                     | Low             | Low                  | Low                     | Low                | 5                                             |
| Pierdomenico          | 2008 | High              | Low                                             | Low                                                     | Low             | Low                  | Low                     | Low                | 6                                             |
| Shimada               | 2008 | Low               | Low                                             | Low                                                     | Low             | Low                  | Low                     | Low                | 7                                             |
| Agarwal               | 2011 | Low               | Low                                             | Low                                                     | Low             | Low                  | High                    | High               | 5                                             |
| Hanninen <sup>†</sup> | 2012 | Low               | Low                                             | Low                                                     | Low             | Low                  | High                    | Low                | 6                                             |
| Hermida               | 2012 | Low               | Low                                             | Low                                                     | Low             | Low                  | High                    | Low                | 6                                             |
| Franklin              | 2012 | High              | High                                            | Low                                                     | Low             | Low                  | Low                     | Low                | 5                                             |
| Mancia <sup>†</sup>   | 2013 | Low               | Low                                             | Low                                                     | Low             | Low                  | High                    | Low                | 6                                             |
| Sung <sup>†</sup>     | 2013 | Low               | High                                            | Low                                                     | Low             | Low                  | High                    | Low                | 5                                             |
| Asayama               | 2014 | High              | High                                            | Low                                                     | Low             | Low                  | Low                     | Low                | 5                                             |
| Minutolo <sup>†</sup> | 2014 | High              | Low                                             | Low                                                     | Low             | Low                  | High                    | Low                | 5                                             |
| Stergiou <sup>†</sup> | 2014 | High              | Low                                             | Low                                                     | Low             | Low                  | High                    | Low                | 5                                             |
| Satoh                 | 2015 | Low               | Low                                             | Low                                                     | Low             | Low                  | Low                     | Low                | 7                                             |
| Tientcheu             | 2015 | Low               | High                                            | Low                                                     | Low             | Low                  | Low                     | Low                | 6                                             |
| Wang <sup>†</sup>     | 2017 | Low               | Low                                             | Low                                                     | Low             | Low                  | High                    | Low                | 6                                             |
| Pierdomenico          | 2017 | High              | Low                                             | Low                                                     | Low             | Low                  | Low                     | Low                | 6                                             |
| Banegas               | 2018 | High              | Low                                             | Low                                                     | Low             | Low                  | Low                     | High               | 5                                             |
| Ntineri <sup>†</sup>  | 2018 | Low               | Low                                             | Low                                                     | Low             | Low                  | High                    | Low                | 6                                             |
| Fujiwara              | 2018 | High              | Low                                             | Low                                                     | Low             | Low                  | Low                     | Low                | 6                                             |
| Spannella             | 2018 | High              | Low                                             | Low                                                     | Low             | Low                  | Low                     | High               | 5                                             |

\*The QUADAS-2 tool assesses if there is a low, high, or unclear risk of bias based on the first four domains (patient selection, index test, reference standard, flow and timing). The tool used for this study was modified to also incorporate quality of analyses, handling of confounding, and outcome assessment. For inclusion, studies were required to have low risk of bias across at least five out of seven domains.

<sup>†</sup>Studies were reviewed separately by outcome; the results were the same across outcomes except with regard to confounding: studies were determined to have a high risk of bias in the handling of confounding if the same covariates were used, without sufficient justification (e.g. exclusion for risk factors for non-cardiac mortality), for analyzing cardiovascular events and all-cause mortality.

Abbreviations: ABPM = Ambulatory blood pressure monitoring; BP = blood pressure; HBPM = home blood pressure monitoring; QUADAS = Quality Assessment of Diagnostic Accuracy Studies

**Appendix Table 4. Multivariable model adjusted covariates\* in eligible studies**

| Author       | Year | Age and sex | Previous CVD events | HTN medication | Smoking status | Lipids or HL | DM or glycemic control | BMI or obesity | Kidney function or CKD | LVH or BNP | Clinic BP | Alcohol use | Other                    |
|--------------|------|-------------|---------------------|----------------|----------------|--------------|------------------------|----------------|------------------------|------------|-----------|-------------|--------------------------|
| Verdecchia   | 1994 | ✓           | ✓                   | N/A            | ✓              | ✓            | ✓                      | ✓              | N/A                    | ✓          | ✓         |             | ABPM SBP and DBP         |
| Kario        | 2001 | ✓           | N/A                 | ✓              |                |              |                        | ✓              | N/A                    |            |           |             |                          |
| Bobrie       | 2004 | ✓           | ✓                   | N/A            | ✓              | ✓            | ✓                      | ✓              |                        |            |           |             | Heart rate               |
| Verdecchia   | 2005 | ✓           | N/A                 | ✓              | ✓              | ✓            |                        | ✓              | N/A                    |            |           |             |                          |
| Ohkubo       | 2005 | ✓           | ✓                   | ✓              | ✓              | ✓            | ✓                      |                |                        |            |           |             |                          |
| Fagard       | 2005 | ✓           | N/A                 | ✓              | ✓              | ✓            | ✓                      | ✓              |                        |            |           |             |                          |
| Pierdomenico | 2005 | ✓           | ✓                   | ✓              | ✓              | ✓            | ✓                      | ✓              | ✓                      | ✓          | ✓         |             | Family history of CVD    |
| Hansen       | 2007 | ✓           | ✓                   | ✓              | ✓              | ✓            | ✓                      | ✓              |                        |            |           | ✓           |                          |
| Pierdomenico | 2008 | ✓           | N/A                 | ✓              | ✓              | ✓            | N/A                    | ✓              | ✓                      | ✓          | ✓         |             | Family history CVD       |
| Shimada      | 2008 | ✓           | ✓                   | N/A            | ✓              |              | ✓                      |                | N/A                    |            |           | ✓           |                          |
| Agarwal      | 2011 | ✓           | ✓                   |                |                |              | N/A                    |                | N/A                    |            |           |             | Race, Hgb, albumin       |
| Hanninen     | 2012 | ✓           | ✓                   | ✓              | ✓              | ✓            | ✓                      | ✓              |                        |            |           | ✓           |                          |
| Hermida      | 2012 | ✓           | N/A                 | ✓              |                |              | ✓                      |                | ✓                      |            |           |             | Sleep duration           |
| Franklin     | 2012 | ✓           | N/A                 | ✓              | ✓              | ✓            | ✓                      | ✓              |                        |            |           |             |                          |
| Mancia       | 2013 | ✓           | ✓                   | ✓              | ✓              | ✓            | ✓                      | ✓              |                        |            |           |             |                          |
| Sung         | 2013 | ✓           | N/A                 | N/A            | ✓              | ✓            | ✓                      | ✓              |                        |            |           |             |                          |
| Asayama      | 2014 | ✓           | ✓                   | N/A            | ✓              | ✓            | ✓                      | ✓              |                        |            |           | ✓           |                          |
| Minutolo     | 2014 | ✓           | ✓                   | ✓              |                |              | ✓                      | ✓              | ✓                      |            |           |             | Non-dipping, Hgb         |
| Stergiou     | 2014 | ✓           | ✓                   | ✓              | ✓              | ✓            | ✓                      | ✓              |                        |            |           |             |                          |
| Satoh        | 2015 | ✓           | ✓                   | ✓              | ✓              | ✓            | ✓                      | ✓              |                        |            |           | ✓           |                          |
| Tientcheu    | 2015 | ✓           | N/A                 | ✓              | ✓              | ✓            | ✓                      | ✓              |                        |            |           |             | Race                     |
| Wang         | 2017 | ✓           | ✓                   |                | ✓              | ✓            | ✓                      | ✓              | ✓                      |            |           | ✓           | Hgb, phosphate           |
| Pierdomenico | 2017 | ✓           | ✓                   | ✓              |                |              | ✓                      |                |                        | ✓          | ✓         |             | LA enlargement, ABPM SBP |
| Banegas      | 2018 | ✓           | ✓                   | ✓              | ✓              | ✓            | ✓                      | ✓              |                        |            | ✓         |             |                          |
| Ntineri      | 2018 | ✓           | ✓                   | ✓              | ✓              |              | ✓                      | ✓              |                        |            |           |             |                          |
| Fujiwara     | 2018 | ✓           | ✓                   | ✓              | ✓              | ✓            | ✓                      | ✓              | ✓                      | ✓          |           |             |                          |
| Spannella    | 2018 | ✓           | ✓                   | ✓              |                | ✓            |                        |                | ✓                      |            |           |             |                          |

\*Confounding was considered to be adequately addressed in the QUADAS-2 assessment if there was adjustment for age, sex, previous CVD events, HTN medication, and at least two additional covariates among smoking status, lipids, DM, BMI, kidney function, LVH, clinic BP, and alcohol use.

All studies that included both cardiovascular events and all-cause mortality used the same covariates in models evaluating each outcome.

Abbreviations: ABPM = Ambulatory blood pressure; BMI = Body mass index; BNP = B-type natriuretic peptide; BP = Blood pressure; CKD = Chronic kidney disease; CVD = Cardiovascular disease; DBP = Diastolic blood pressure; DM = diabetes mellitus; Hgb = Hemoglobin; HL = hyperlipidemia; HTN = Hypertension; LA = Left atrial; LVH = Left ventricular hypertrophy; N/A = Not applicable (due to exclusion criteria or other cohort characteristic); SBP = Systolic blood pressure

**Appendix Table 5. Subgroup analyses of cardiovascular event risk in white coat hypertension and white coat effect based on study characteristics**

| Subgroup analysis                                   | White coat hypertension (untreated) |                  |                          | White coat effect (treated) |                  |                          | Combined white coat hypertension and white coat effect |                   |                          |
|-----------------------------------------------------|-------------------------------------|------------------|--------------------------|-----------------------------|------------------|--------------------------|--------------------------------------------------------|-------------------|--------------------------|
|                                                     | N                                   | HR (95% CI)      | I <sup>2</sup> (P-value) | N                           | HR (95% CI)      | I <sup>2</sup> (P-value) | N                                                      | HR (95% CI)       | I <sup>2</sup> (P-value) |
| <b>Blood pressure measurement type</b>              |                                     |                  |                          |                             |                  |                          |                                                        |                   |                          |
| ABPM                                                | 7                                   | 1.35 (1.02-2.02) | 2.9% (0.287)             | 3                           | 1.11 (0.89-1.40) | 0% (0.885)               | 6                                                      | 1.16 (0.92-1.53)  | 0% (0.406)               |
| HBPM                                                | 2                                   | 1.42 (0.88-2.31) |                          | 3                           | 1.15 (0.79-1.62) | 0% (0.887)               | 5                                                      | 1.46 (0.84-2.57)  | 57.9% (0.016)            |
| <b>Blood pressure monitor validation</b>            |                                     |                  |                          |                             |                  |                          |                                                        |                   |                          |
| Validated                                           | 7                                   | 1.51 (1.15-2.01) | 0% (0.454)               | 5                           | 1.14 (0.92-1.42) | 0% (0.977)               | 8                                                      | 1.21 (0.83-1.82)  | 49.3% (0.035)            |
| Validation undetermined                             | 1                                   | 1.20 (0.93-1.54) |                          | 1                           | 1.09 (0.79-1.52) |                          | 2                                                      | 1.28 (0.96-2.27)  |                          |
| <b>Out-of-office blood pressure threshold</b>       |                                     |                  |                          |                             |                  |                          |                                                        |                   |                          |
| Daytime <135/85                                     | 4                                   | 1.29 (1.03-1.66) | 0% (0.289)               | 4                           | 1.12 (0.89-1.42) | 0% (0.962)               | 8                                                      | 1.31 (0.97-1.80)  | 36.9% (0.073)            |
| 24-hour <130/80                                     | 3                                   | 1.36 (0.91-2.33) | 9.5% (0.199)             | 2                           | 1.13 (0.79-1.60) | 0% (0.643)               | 1                                                      | 1.96 (0.12-32.12) |                          |
| Other                                               | 1                                   | 1.45 (0.28-7.51) |                          | 0                           |                  |                          | 2                                                      | 1.01 (0.51-3.31)  |                          |
| <b>Study design regarding participant inclusion</b> |                                     |                  |                          |                             |                  |                          |                                                        |                   |                          |
| Recruited                                           | 4                                   | 1.45 (1.03-2.42) | 0% (0.318)               | 3                           | 1.15 (0.79-1.62) | 0% (0.887)               | 9                                                      | 1.28 (0.90-1.87)  | 49.6% (0.028)            |
| Referred                                            | 4                                   | 1.31 (0.92-1.98) | 0% (0.301)               | 3                           | 1.11 (0.89-1.40) | 0% (0.885)               | 1                                                      | 1.22 (0.96-1.53)  |                          |
| <b>Mean age</b>                                     |                                     |                  |                          |                             |                  |                          |                                                        |                   |                          |
| <55 years                                           | 6                                   | 1.21 (1.00-1.51) | 0% (0.520)               | 1                           | 1.09 (0.79-1.52) |                          | 5                                                      | 1.65 (0.96-3.07)  | 54.9% (0.017)            |
| ≥55 years                                           | 3                                   | 1.52 (1.09-2.12) | 0% (0.385)               | 5                           | 1.14 (0.92-1.42) | 0% (0.997)               | 6                                                      | 1.15 (0.90-1.39)  | 0% (0.519)               |
| <b>Cohort size</b>                                  |                                     |                  |                          |                             |                  |                          |                                                        |                   |                          |
| <2,000                                              | 4                                   | 1.56 (0.71-4.01) | 0% (0.317)               | 1                           | 1.20 (0.82-1.76) |                          | 5                                                      | 1.76 (1.03-2.82)  | 14.3% (0.306)            |
| ≥2,000                                              | 4                                   | 1.35 (1.09-1.77) | 0% (0.283)               | 5                           | 1.10 (0.90-1.36) | 0% (0.985)               | 5                                                      | 1.10 (0.81-1.39)  | 0% (0.151)               |
| <b>Participant risk</b>                             |                                     |                  |                          |                             |                  |                          |                                                        |                   |                          |
| Included prior CVD                                  | 5                                   | 1.36 (1.12-1.83) | 0% (0.501)               | 4                           | 1.15 (0.92-1.43) | 0% (0.972)               | 7                                                      | 1.40 (1.00-2.03)  | 47.9% (0.042)            |
| Excluded prior CVD                                  | 2                                   | 0.98 (0.44-2.20) |                          | 1                           | 1.09 (0.79-1.52) |                          | 2                                                      | 0.88 (0.56-1.37)  |                          |
| Included prior CKD or diabetes                      | 7                                   | 1.38 (1.15-1.88) | 0% (0.323)               | 6                           | 1.14 (0.93-1.41) | 0% (0.993)               | 10                                                     | 1.26 (0.95-1.73)  | 47.5% (0.045)            |
| Excluded prior CKD or diabetes                      | 1                                   | 0.97 (0.38-2.46) |                          | 0                           |                  |                          | 0                                                      |                   |                          |
| <b>Duration of follow up</b>                        |                                     |                  |                          |                             |                  |                          |                                                        |                   |                          |
| <5 years                                            | 2                                   | 1.87 (0.84-3.36) |                          | 3                           | 1.08 (0.72-1.58) | 0% (0.869)               | 2                                                      | 0.75 (0.29-3.05)  |                          |
| ≥5 years                                            | 6                                   | 1.29 (1.06-1.63) | 0% (0.429)               | 3                           | 1.14 (0.92-1.42) | 0% (0.928)               | 8                                                      | 1.32 (0.99-1.85)  | 50.7% (0.036)            |
| <b>Study year</b>                                   |                                     |                  |                          |                             |                  |                          |                                                        |                   |                          |
| On or before 2012                                   | 3                                   | 1.01 (0.53-1.97) | 0% (0.979)               | 3                           | 1.10 (0.79-1.52) | 0% (0.885)               | 4                                                      | 1.08 (0.78-1.31)  | 0% (0.429)               |
| After 2012                                          | 5                                   | 1.39 (1.15-2.13) | 0% (0.161)               | 3                           | 1.14 (0.89-1.45) | 0% (0.894)               | 6                                                      | 1.69 (1.03-2.69)  | 31.9% (0.156)            |

I<sup>2</sup> value was not reported in analyses of less than 3 studies due to insufficient statistical power to assess for heterogeneity

Abbreviations: ABPM = Ambulatory blood pressure monitoring; CI = Confidence interval; CKD = Chronic kidney disease; CVD = Cardiovascular disease; HR = Hazard ratio; N = Number of studies

**Appendix Table 6. Study influence analyses of cardiovascular event risk in white coat hypertension and white coat effect**

| White coat hypertension (untreated) |                  | White coat effect (treated) |                  | Combined white coat hypertension and white coat effect |                  |
|-------------------------------------|------------------|-----------------------------|------------------|--------------------------------------------------------|------------------|
| Study Omitted                       | HR (95% CI)      | Study Omitted               | HR (95% CI)      | Study Omitted                                          | HR (95% CI)      |
| Verdecchia 1994                     | 1.36 (1.13-1.80) | Bobrie 2004                 | 1.12 (0.88-1.41) | Fagard 2005                                            | 1.30 (0.96-1.84) |
| Fargard 2005                        | 1.37 (1.14-1.85) | Shimada 2008                | 1.13 (0.91-1.40) | Hansen 2007                                            | 1.28 (0.90-1.87) |
| Pierdomenico 2008                   | 1.38 (1.15-1.88) | Franklin 2012               | 1.14 (0.87-1.49) | Hanninen 2012                                          | 1.32 (0.96-1.88) |
| Mancia 2013                         | 1.36 (1.13-1.78) | Stergiou 2014               | 1.12 (0.85-1.45) | Mancia 2013                                            | 1.22 (0.90-1.68) |
| Sung 2013                           | 1.34 (1.10-1.68) | Pierdomenico 2017           | 1.10 (0.84-1.44) | Tientcheu 2015                                         | 1.20 (0.89-1.67) |
| Asayama 2014                        | 1.51 (1.15-2.01) | Banegas 2018                | 1.14 (0.89-1.46) | Ntineri 2018                                           | 1.14 (0.92-1.42) |
| Stergiou 2014                       | 1.35 (1.02-2.02) |                             |                  | Hermida 2012                                           | 1.35 (0.99-1.88) |
| Banegas 2018                        | 1.29 (1.06-1.61) |                             |                  | Minutolo 2014                                          | 1.24 (0.90-1.75) |
|                                     |                  |                             |                  | Wang 2017                                              | 1.26 (0.94-1.72) |
|                                     |                  |                             |                  | Fujiwara 2018                                          | 1.32 (1.00-1.85) |

Abbreviations: CI = Confidence interval; HR = Hazard ratio
